# Supplementary material for: Ectomycorrhizal Fungal Community and Ascoma Production in a Declining Tuber borchii Plantation
Source: MDPI journal article supplement (doi:10.3390/jof9060678), 2023-06-15
Supplement: s1 [file s1]

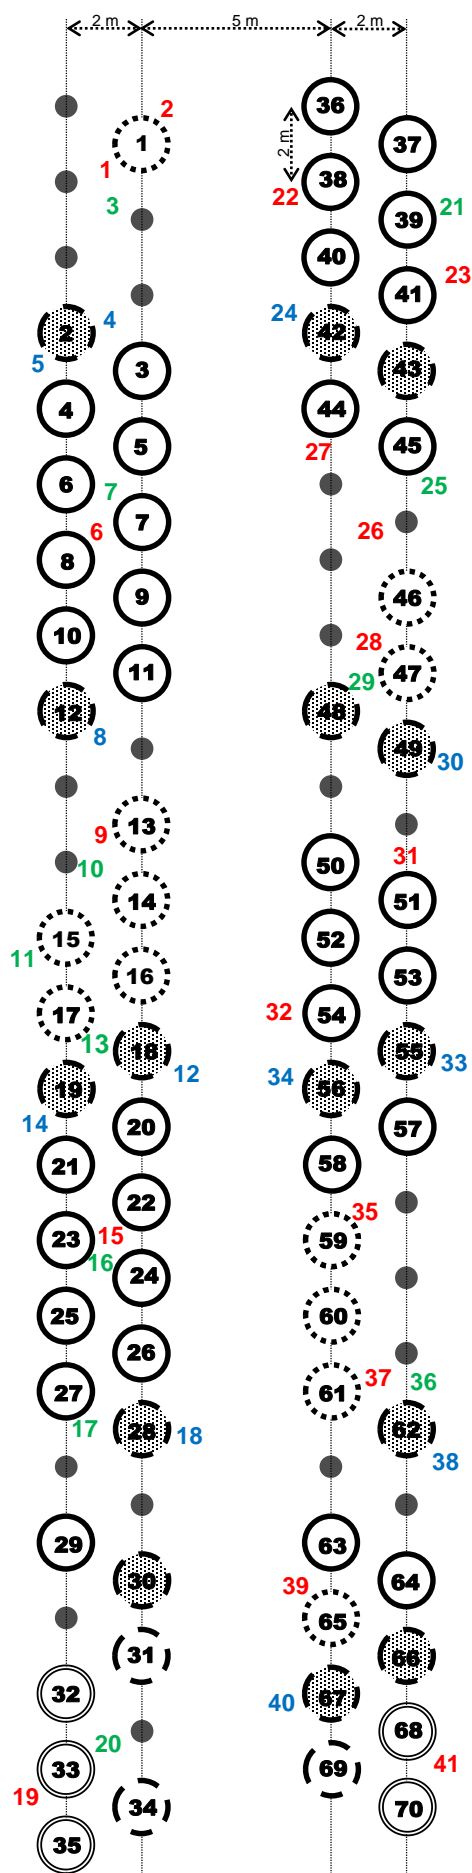

- dead tree
- *P. pinea*
- *C. avellana*
- *Q. robur*
- *Q. pubescens*
- *C. avellana* (not inoculated)

FP samples

FA samples

NT samples

Plant number
