# Supplementary figures and images for: Ectomycorrhizal Fungal Community and Ascoma Production in a Declining Tuber borchii Plantation
Source: MDPI journal article supplement (doi:10.3390/jof9060678), 2023-06-15

*T. borchii* fruiting points

2016 \*

2017 \*

2018 \*

2020 \*

▲ *T. maculatum* fruiting points

▲ *T. rufum* fruiting points

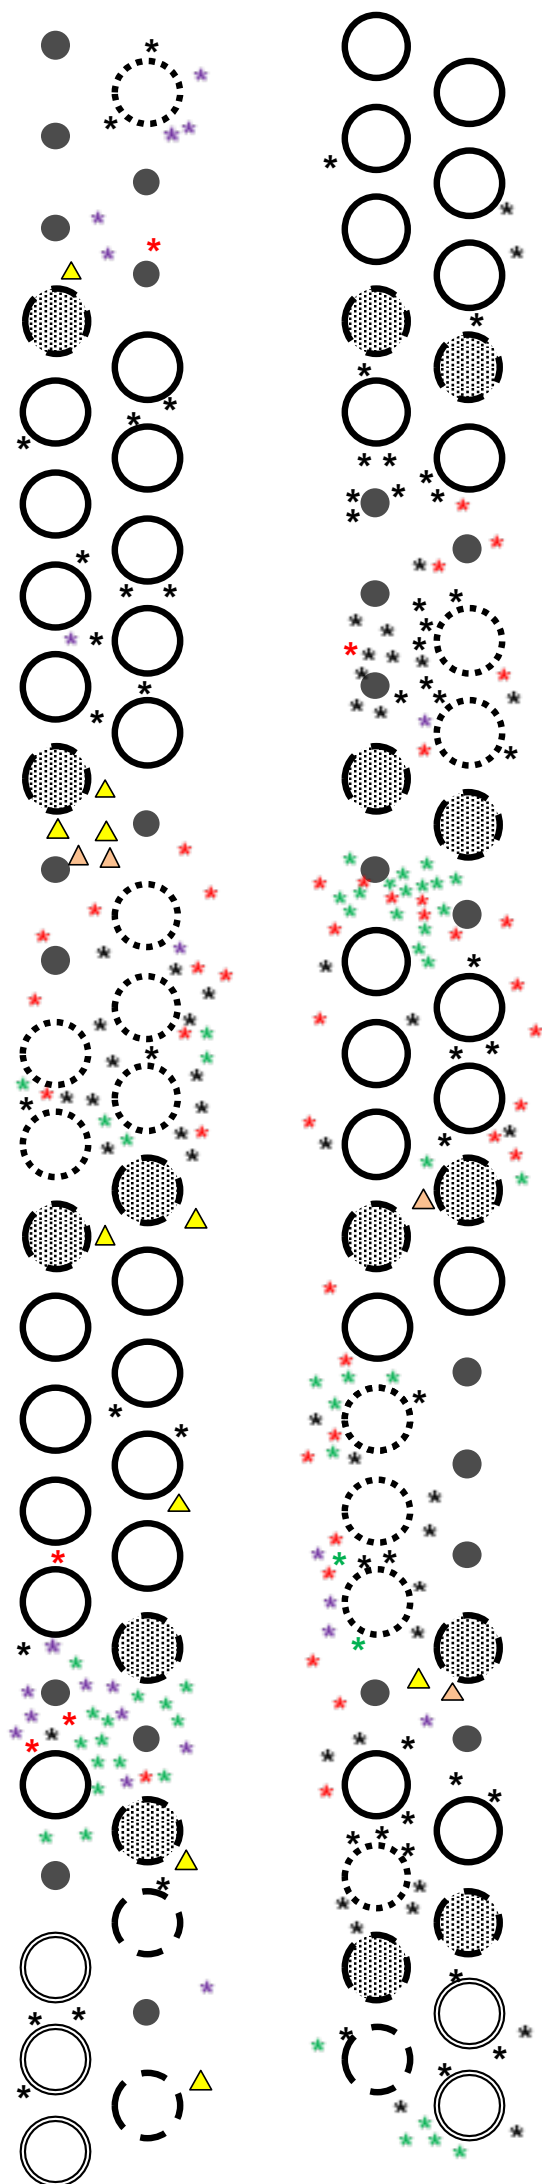

Supplement: s1 [file s1]

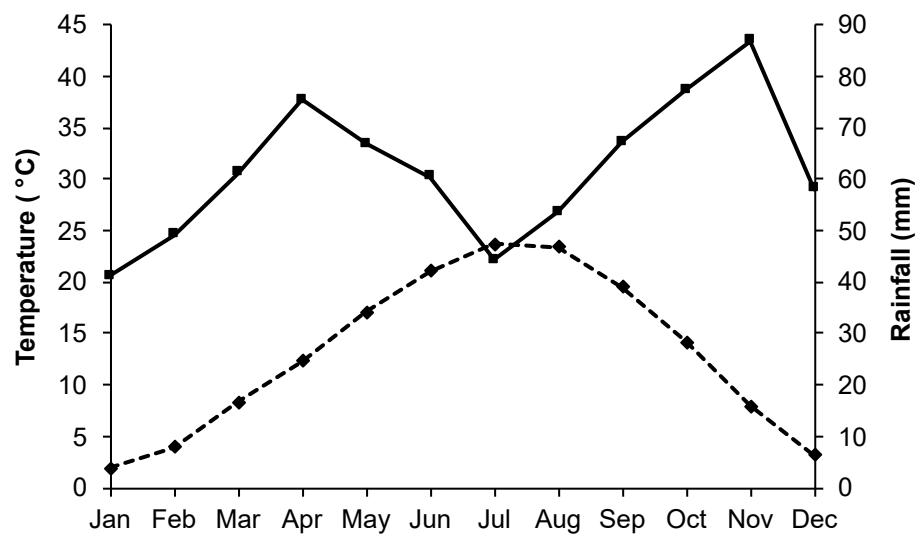

Supplement: s1 [file s1]
